# Supplementary material
Source: publisher figshare collection journal article supplement (https://tandf.figshare.com/ndownloader/files/20020256)
Supplement: Supplementary file 1 [file 20020256]

**Supporting Information**

Rutheniumethynyl-triarylamine mixed-valence conjugated system: Syntheses, (spectro-)electrochemistry, and theoretical calculations

YA-PING OU*, YUXUAN HU, MENG XU, AIHUI WANG and SHENG HUA LIU*

**TABLE OF CONTENTS**

1. Crystallographic Information (Table S1) S2

2. DFT Calculations Information (Figures S1 and S2) S3

3. NMR Information (Figures S3-S5) S5

**1. Crystallographic Information**

Table S1. Crystal data and structure refinement for **3**.

| Formula | C58H59NO3P2Ru |
| --- | --- |
| FW | 981.07 |
| Temperature | 296 K |
| Wavelength | 0.71073 Å |
| Crystal system | Monoclinic |
| Space group | P2(1)/c |
| *a* (Å) | 14.0091(7) |
| *b* (Å) | 33.0191(17) |
| *c* (Å) | 11.3535(6) |
| *α* (°) | 90 |
| *β* (°) | 104.6200(10) |
| *γ* (°) | 90 |
| *V* (Å3) | 5081.7(5) |
| Z | 4 |
| Density (calculated) (Mg/m3) | 1.282 |
| Absorption coefficient (mm-1) | 0.416 |
| F(000) | 2048 |
| Crystal size (mm3) | 0.24 × 0.23 × 0.21 |
| *θ* Range (°) | 1.62 to 27.55 |
| Index ranges | -13<=h<=18, -42<=k<=40, -14<=l<=14 |
| Reflections collected | 30837 |
| Independent reflections | 11516 [R(int) = 0.0317] |

1. **DFT Calculations Information**

Figure S1. Isosurface plots of molecular orbitals involved in the major electronic excitations for **3**.

Figure S2. Isosurface plots of molecular orbitals involved in the major electronic excitations for **32+**.

**3. NMR Information**


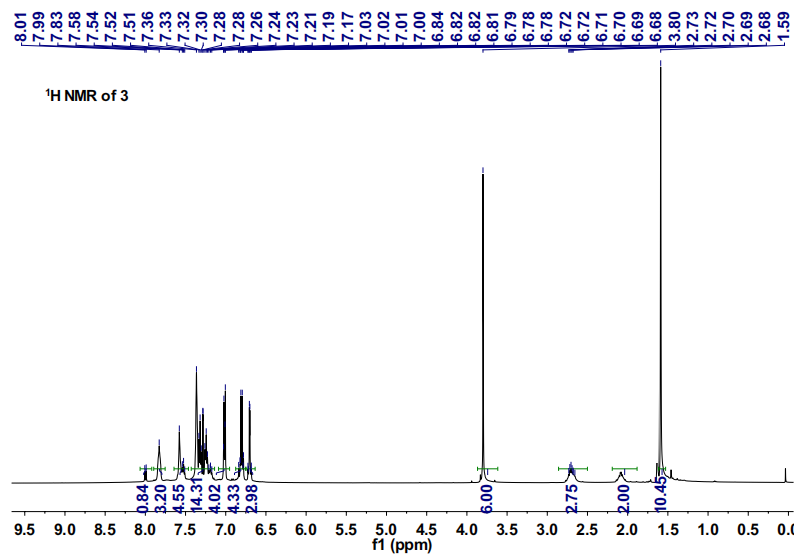


Figure S3. 1H NMR spectrum (500 MHz, CDCl3) of **3**.


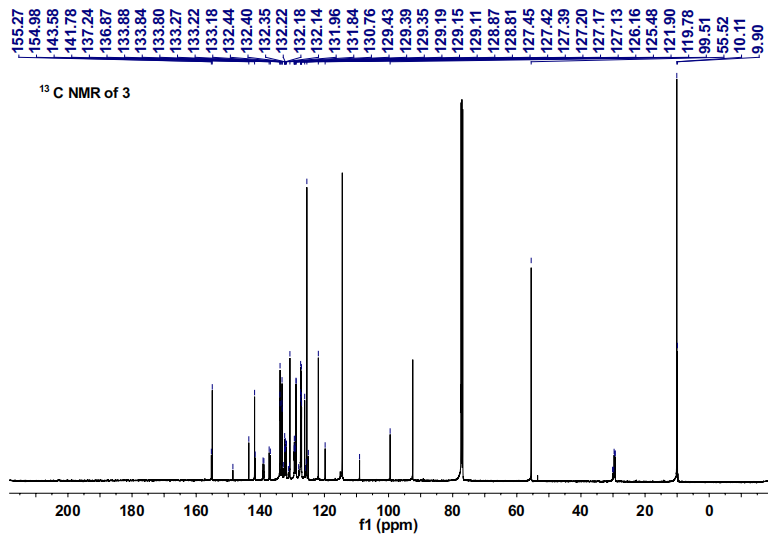


Figure S4. 13C NMR spectrum (125 MHz, CDCl3) of **3**.


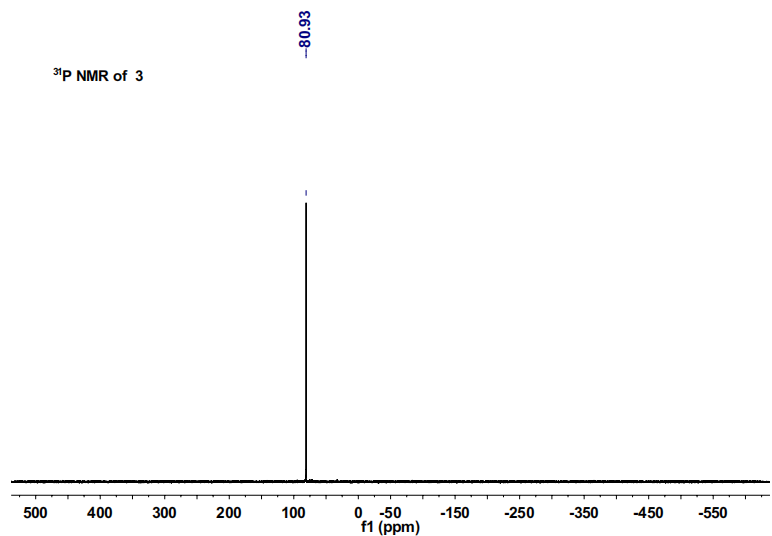


Figure S5. 31P NMR spectrum (100 MHz, CDCl3) of **3**.
